# Supplementary material
Source: PubMed Central journal article supplement (PMC6258923)
Supplement: ba013359-suppl1.pdf [file ba013359-suppl1.pdf]

# Supplemental Figure 1

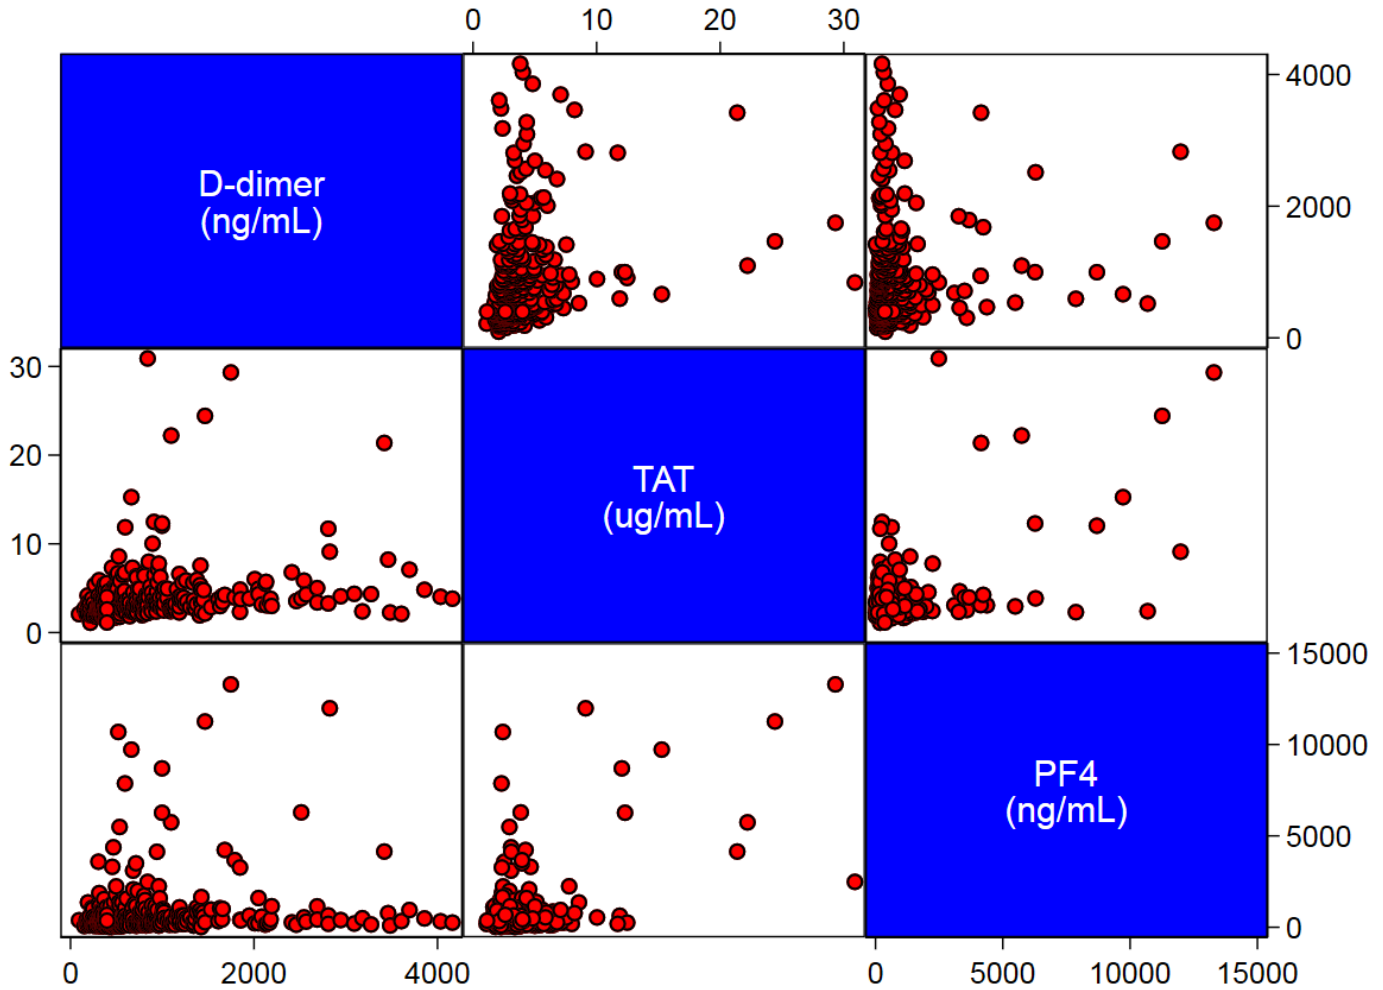

**Supplemental Figure 1. Relationship between measured biomarkers.** Scatterplot matrices of D-dimer, thrombin-antithrombin (TAT), and PF4 were generated to visualize the relationship between each of these biomarkers.

**Supplemental Table 1.** P-values for between group comparison of point estimates for parameters, Wald test

|                                               | Control v.<br>Sub-A | Control v.<br>SGA | Control v.<br>FGA | Sub-A v.<br>SGA | Sub-A v.<br>FGA | SGA v.<br>FGA |
|-----------------------------------------------|---------------------|-------------------|-------------------|-----------------|-----------------|---------------|
| D-dimer quartiles <sup>1</sup>                |                     |                   |                   |                 |                 |               |
| < 406 ng/mL                                   | –                   | –                 | –                 | –               | –               | –             |
| 406-594 ng/mL                                 | 0.195               | 0.010             | 0.041             | 0.166           | 0.288           | 0.870         |
| 595-1006 ng/mL                                | 0.029               | 0.001             | 0.001             | 0.201           | 0.123           | 0.747         |
| > 1006 ng/mL                                  | 0.196               | <0.001            | <0.001            | 0.002           | <0.001          | 0.595         |
| D-dimer threshold <sup>1</sup>                |                     |                   |                   |                 |                 |               |
| < 500 ng/mL                                   | –                   | –                 | –                 | –               | –               | –             |
| ≥ 500 ng/mL                                   | 0.007               | <0.001            | <0.001            | 0.076           | 0.045           | 0.742         |
| Age-adjusted D-dimer threshold <sup>1</sup>   |                     |                   |                   |                 |                 |               |
| Below                                         | –                   | –                 | –                 | –               | –               | –             |
| Over                                          | 0.074               | <0.001            | <0.001            | 0.033           | 0.002           | 0.296         |
| Platelet factor 4, quartiles <sup>2</sup>     |                     |                   |                   |                 |                 |               |
| < 182 ng/mL                                   | –                   | –                 | –                 | –               | –               | –             |
| 182-372 ng/mL                                 | 0.120               | 0.313             | 0.447             | 0.447           | 0.371           | 0.837         |
| 373-739 ng/mL                                 | 0.676               | 0.062             | 0.378             | 0.012           | 0.143           | 0.250         |
| > 739 ng/mL                                   | 0.266               | 0.201             | 0.608             | 0.009           | 0.074           | 0.380         |
| Thrombin-antithrombin, quartiles <sup>3</sup> |                     |                   |                   |                 |                 |               |
| < 2.5 µg/mL                                   | –                   | –                 | –                 | –               | –               | –             |
| 2.5-3.1 µg/mL                                 | 0.822               | 0.574             | 0.013             | 0.780           | 0.012           | 0.006         |
| 3.1-4.2 µg/mL                                 | 0.014               | 0.462             | 0.003             | 0.001           | 0.074           | 0.001         |
| >4.2 µg/mL                                    | 0.003               | 0.037             | <0.001            | 0.166           | 0.006           | <0.001        |

<sup>1</sup> D-dimer models adjusted for age, TAT, smoking status, CHD, and renal insufficiency; <sup>2</sup> PF4 models adjusted for age, TAT, D-dimer, smoking status, CHD, renal insufficiency, and diabetes; <sup>3</sup>TAT models were adjusted for age, D-dimer, smoking status, CHD, and renal insufficiency; <sup>4</sup>CHD model adjusted for age, TAT, D-dimer, smoking status, and renal insufficiency; <sup>4</sup> Statin use model adjusted for age, TAT, D-dimer, smoking status, CHD, renal insufficiency, and diabetes ; <sup>5</sup> Aspirin use model adjusted for age, TAT, D-dimer, smoking status, renal insufficiency, CHD, and diabetes; <sup>6</sup> Smoking status model adjusted for age TAT, D-dimer, CHD, and renal insufficiency

**Supplemental Table 2.** Bivariate linear regression on growth: predicted influence of each individual characteristic on growth (n=237)

|                                                       | <b><math>\beta</math>-Coefficient<br/>(mm change/ year)</b> | <b>95% CI</b>     |
|-------------------------------------------------------|-------------------------------------------------------------|-------------------|
| Age at Diameter 1 (1 year increase)                   | 0.01                                                        | -0.03, 0.04       |
| D-dimer, linear (500 ng/mL increase)                  | 0.29                                                        | 0.15, 0.43        |
| D-dimer quartiles                                     |                                                             |                   |
| < 406 ng/mL                                           | 1.00                                                        | (referent)        |
| 406-594 ng/mL                                         | 0.54                                                        | -0.26, 1.34       |
| 595-1006 ng/mL                                        | 1.13                                                        | 0.36, 1.91        |
| > 1006 ng/mL                                          | 1.48                                                        | 0.72, 2.24        |
| D-dimer threshold                                     |                                                             |                   |
| < 500 ng/mL                                           | 1.00                                                        | (referent)        |
| $\geq$ 500 ng/mL                                      | 0.17                                                        | 0.12, 0.22        |
| <u>Age-adjusted D-dimer threshold<sup>1</sup></u>     | -                                                           | -                 |
| <u>Below</u>                                          | <u>1.00</u>                                                 | <u>(referent)</u> |
| <u>Over</u>                                           | <u>0.95</u>                                                 | <u>0.50, 1.39</u> |
| Platelet factor 4, linear (500 ng/mL increase)        | 0.17                                                        | 0.12, 0.22        |
| Platelet factor 4, quartiles                          |                                                             |                   |
| < 182 ng/mL                                           | 1.00                                                        | (referent)        |
| 182-372 ng/mL                                         | 0.07                                                        | -0.59, 0.73       |
| 373-739 ng/mL                                         | 0.43                                                        | -0.23, 1.09       |
| > 739 ng/mL                                           | 0.82                                                        | 0.17, 1.47        |
| Thrombin-antithrombin, linear (1 $\mu$ g/mL increase) | 0.26                                                        | 0.21, 0.31        |
| Thrombin-antithrombin, quartiles                      |                                                             |                   |
| < 2.5 $\mu$ g/mL                                      | 1.00                                                        | (referent)        |
| 2.5-3.1 $\mu$ g/mL                                    | 0.60                                                        | -0.10, 1.31       |
| 3.1-4.2 $\mu$ g/mL                                    | 1.08                                                        | 0.41, 1.76        |
| >4.2 $\mu$ g/mL                                       | 1.80                                                        | 1.15, 2.45        |
| Congestive heart disease                              |                                                             |                   |
| No                                                    | 1.00                                                        | (referent)        |
| Yes                                                   | 0.30                                                        | -0.19, 0.79       |
| Hypertension                                          |                                                             |                   |
| No                                                    | 1.00                                                        | (referent)        |
| Yes                                                   | -0.02                                                       | -0.49, 0.45       |
| Cardiovascular disease                                |                                                             |                   |
| No                                                    | 1.00                                                        | (referent)        |
| Yes                                                   | -0.68                                                       | -1.32, -0.04      |
| Claudication                                          |                                                             |                   |
| No                                                    | 1.00                                                        | (referent)        |
| Yes                                                   | -0.85                                                       | -1.72, 0.03       |
| COPD                                                  |                                                             |                   |
| No                                                    | 1.00                                                        | (referent)        |
| Yes                                                   | 0.06                                                        | -0.61             |
| Renal insufficiency                                   |                                                             |                   |
| No                                                    | 1.00                                                        | (referent)        |
| Yes                                                   | 0.61                                                        | -0.52, 1.74       |
| Diabetes                                              |                                                             |                   |
| No                                                    | 1.00                                                        | (referent)        |
| Yes                                                   | -0.73                                                       | -1.37, -0.09      |
| Statin use                                            |                                                             |                   |
| No                                                    | 1.00                                                        | (referent)        |
| Yes                                                   | -0.03                                                       | -0.48, 0.43       |
| Aspirin Use                                           |                                                             |                   |
| No                                                    | 1.00                                                        | (referent)        |
| Yes                                                   | 0.06                                                        | -0.40, 0.51       |
| Smoking Status                                        |                                                             |                   |
| Never                                                 | 1.00                                                        | (referent)        |
| Former                                                | -0.35                                                       | -1.02, 0.32       |
| Current                                               | 0.37                                                        | -0.35, 1.10       |

**Supplemental Table 3.** Correlation of biomarkers

---

|                              | <u>D-dimer</u> | <u>Platelet Factor 4</u> | <u>Thrombin-antithrombin</u> |
|------------------------------|----------------|--------------------------|------------------------------|
| <u>D-dimer</u>               | <u>1.000</u>   | -                        | -                            |
| <u>Platelet Factor 4</u>     | <u>0.138</u>   | <u>1.000</u>             | -                            |
| <u>Thrombin-antithrombin</u> | <u>0.248</u>   | <u>0.530</u>             | <u>1.000</u>                 |

---
